# Supplementary material for: Enhanced stability and tunable photoluminescence in Mn2+-doped one-dimensional hybrid lead halide perovskites for high-performance white light emitting diodes
Source: Royal Society of Chemistry journal article supplement (doi:10.1039/d3ra02813e), 2023-01-01
Supplement: d3ra02813e1.pdf [file d3ra02813e1.pdf]

## Supporting Information

### Enhanced Stability and Tunable Photoluminescence in Mn<sup>2+</sup>-Doped One-Dimensional Hybrid Lead Halide Perovskites for High- Performance White Light Emitting Diodes

Jie Zhang,<sup>ab</sup> Kai-Qi Sun,<sup>b</sup> Zhong-Hui Zhang,<sup>b</sup> Ri-Cheng Wang,<sup>b</sup> Zi-Han Lin,<sup>b</sup>  
Xiao-Wu Lei,<sup>b</sup> Yu-Yin Wang,<sup>\*b</sup> Ping Ju,<sup>a</sup> and Yuan-Chun He<sup>\*a</sup>

<sup>a</sup> School of Chemistry and Chemical Engineering, Qufu Normal University, Qufu,  
Shandong, 273165, P. R. China

<sup>b</sup> School of Chemistry, Chemical Engineer and Materials, Jining University, Qufu,  
Shandong, 273155, P. R. China

*Corresponding Authors:* wangyuyin66@163.com; heyc240@nenu.edu.cn.

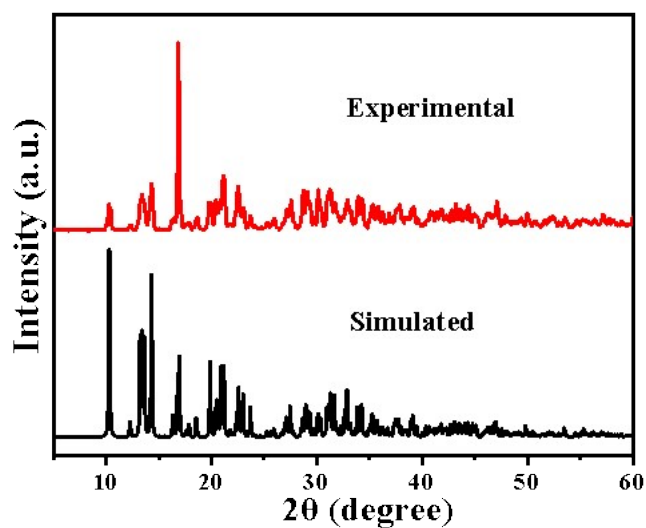

**Fig. S1.** The simulated and experimental powder X-ray diffraction patterns of compound **1**.

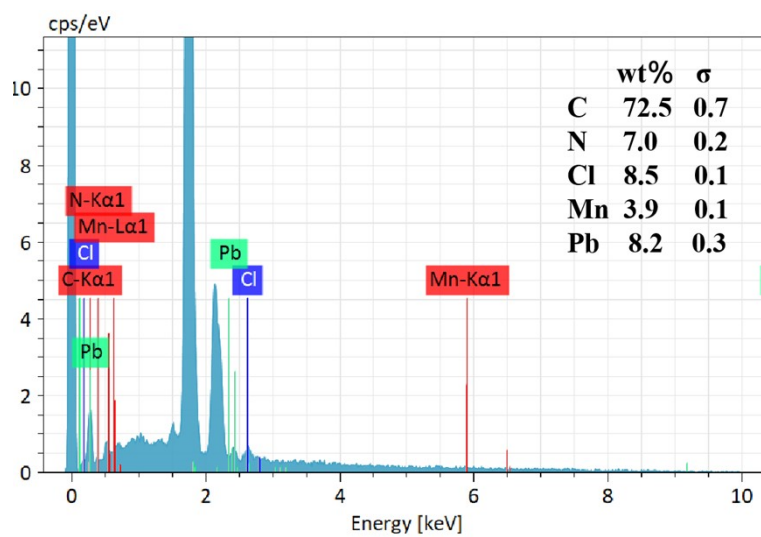

**Fig. S2.** The EDX analysis result of compound **8**.

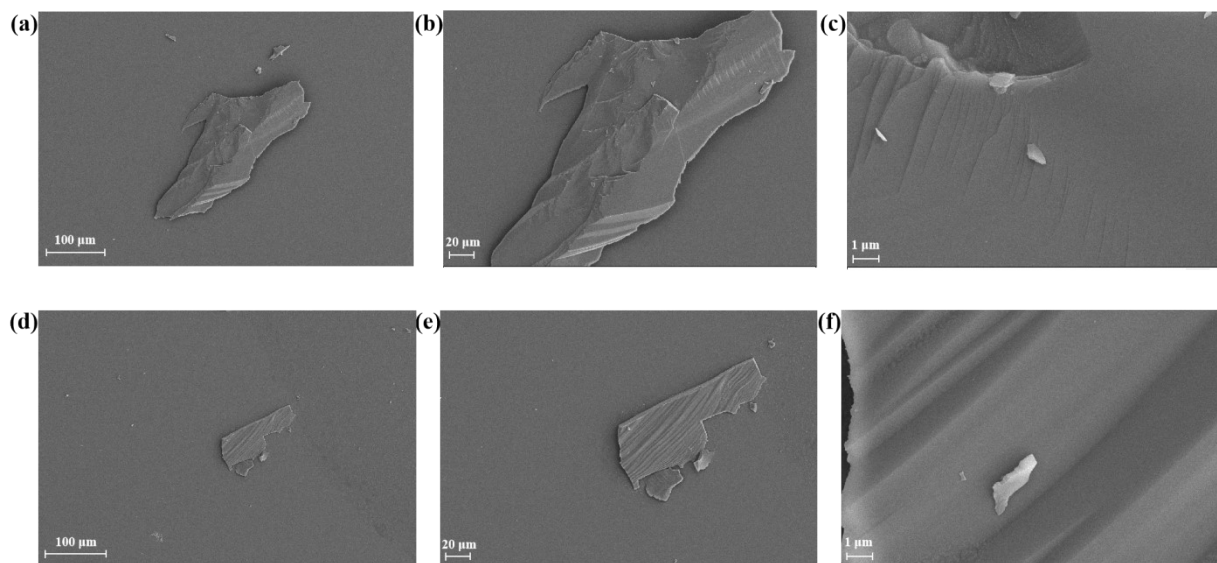

Fig. S3. SEM images compound 1 (a-c) and compound 8 (d-f).

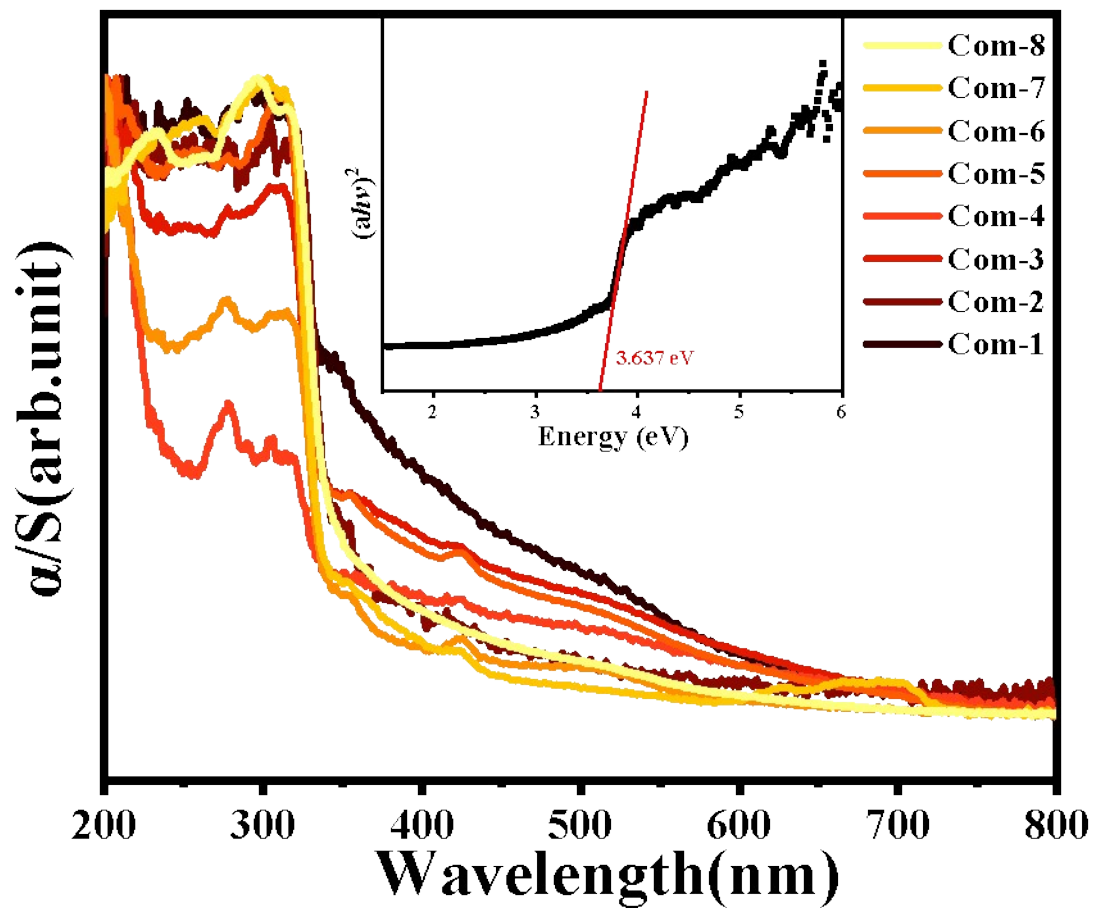

Fig. S4. The solid-state UV-Vis absorption spectra of compounds 1-8.

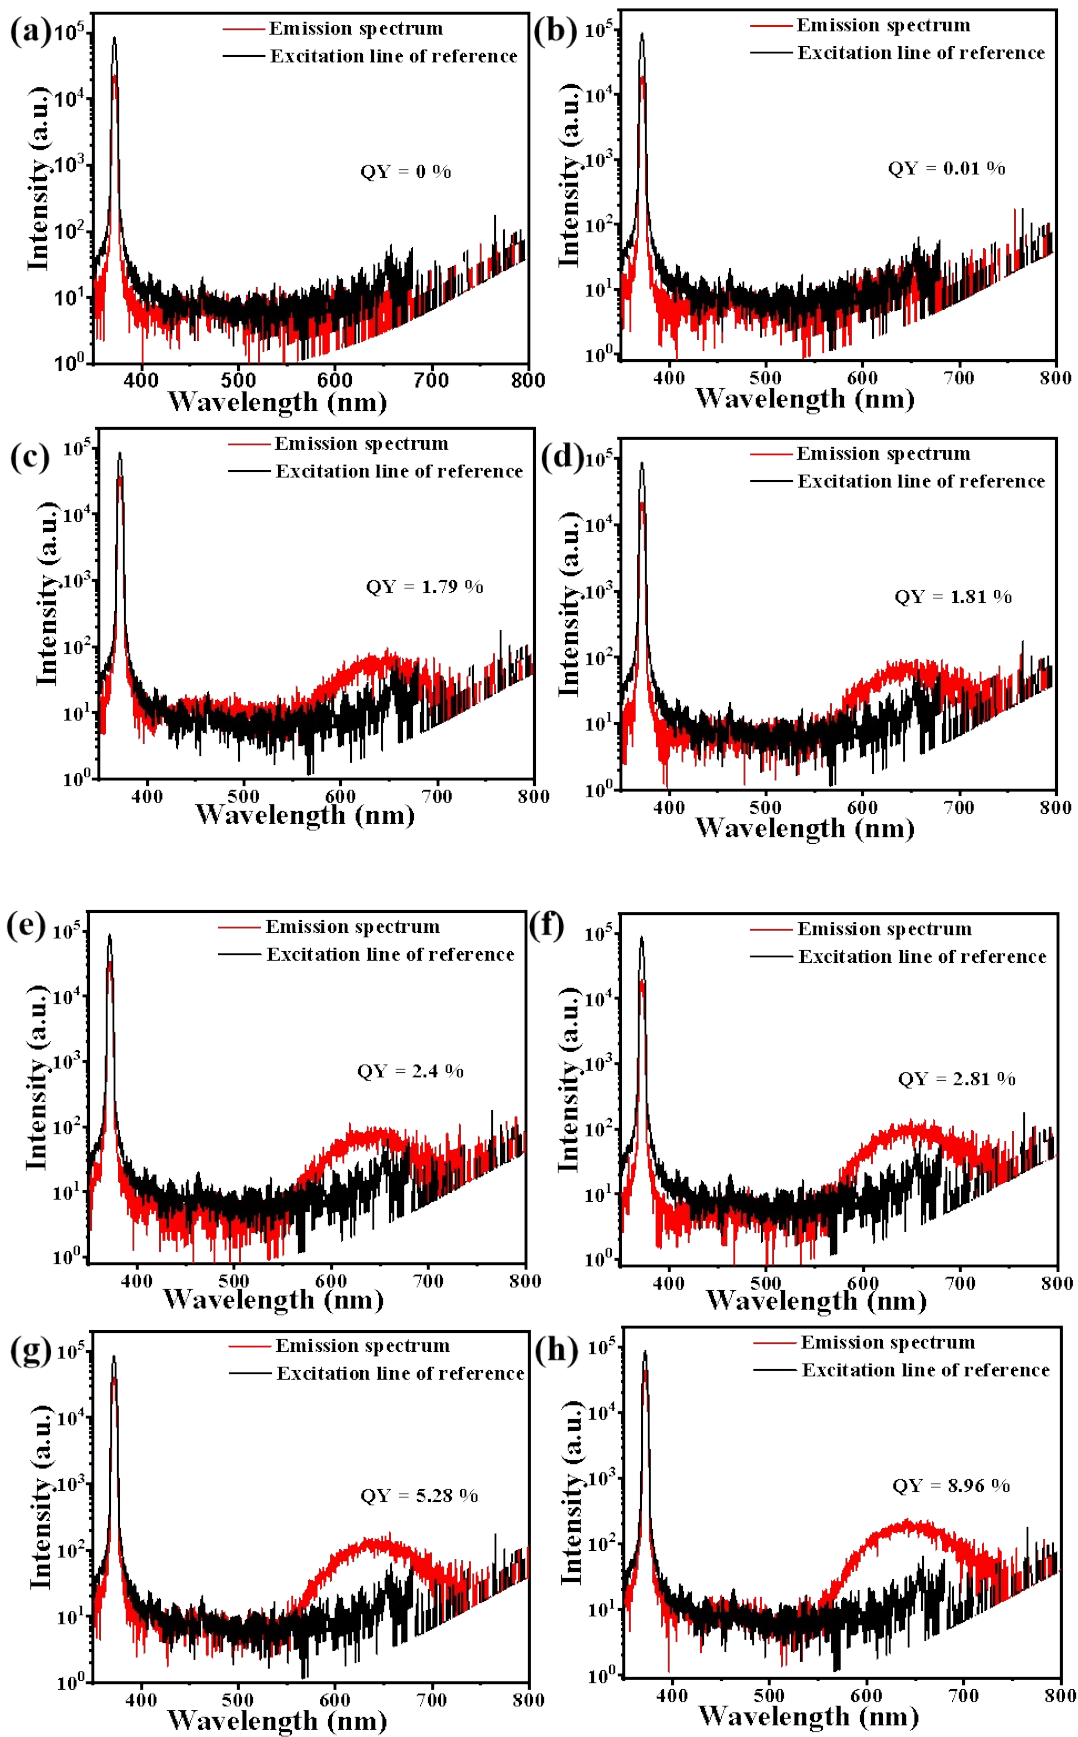

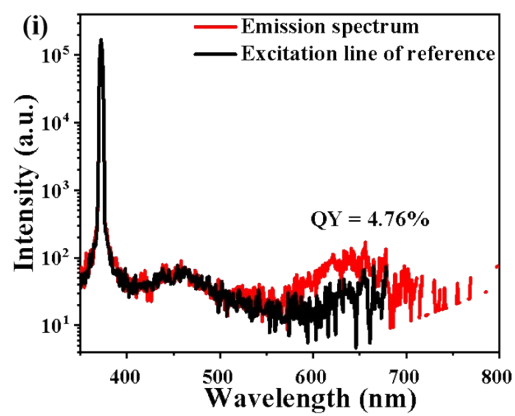

Fig. S5. The PLQYs of compounds **1** (a), **2** (b), **3** (c), **4** (d), **5** (e), **6** (f), **7** (g), **8** (h), **9** (i).

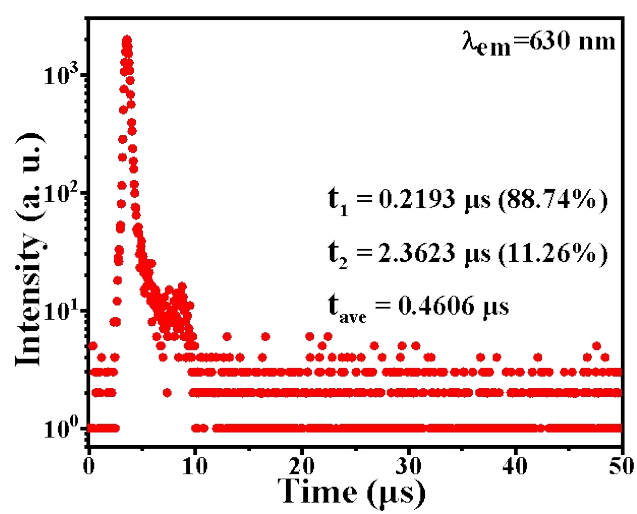

Fig. S6. The PL decay curves monitoring at 630 nm of compound **8** at 300 K.

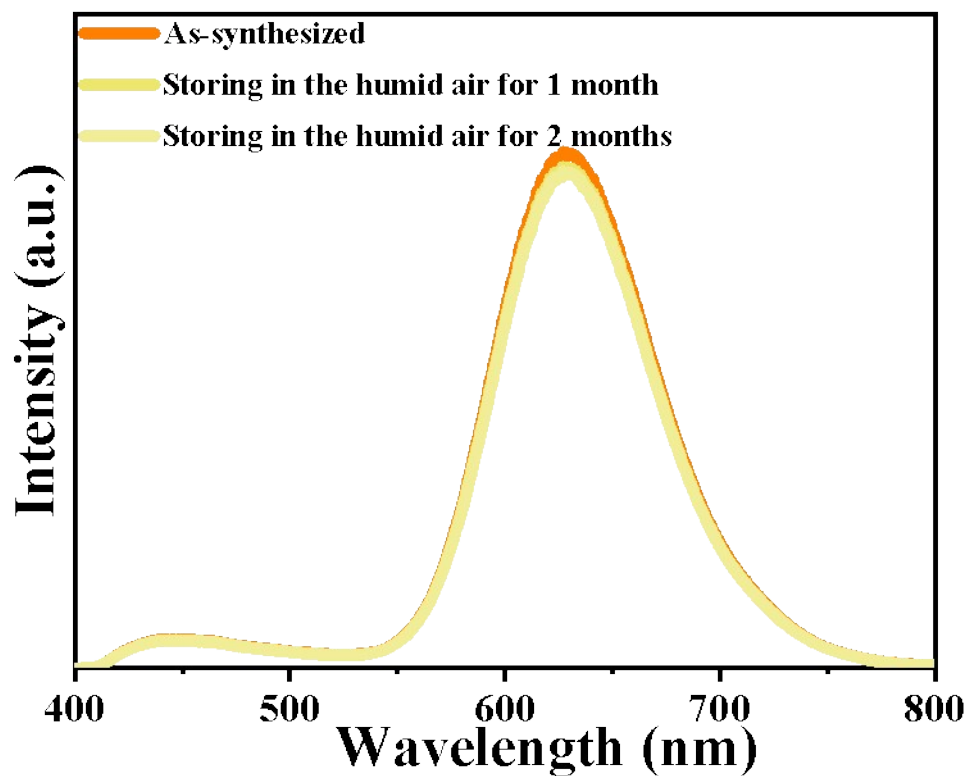

Fig. S7. Comparisons of compound 8 after storing in ambient atmosphere for 1 month and 2 months.

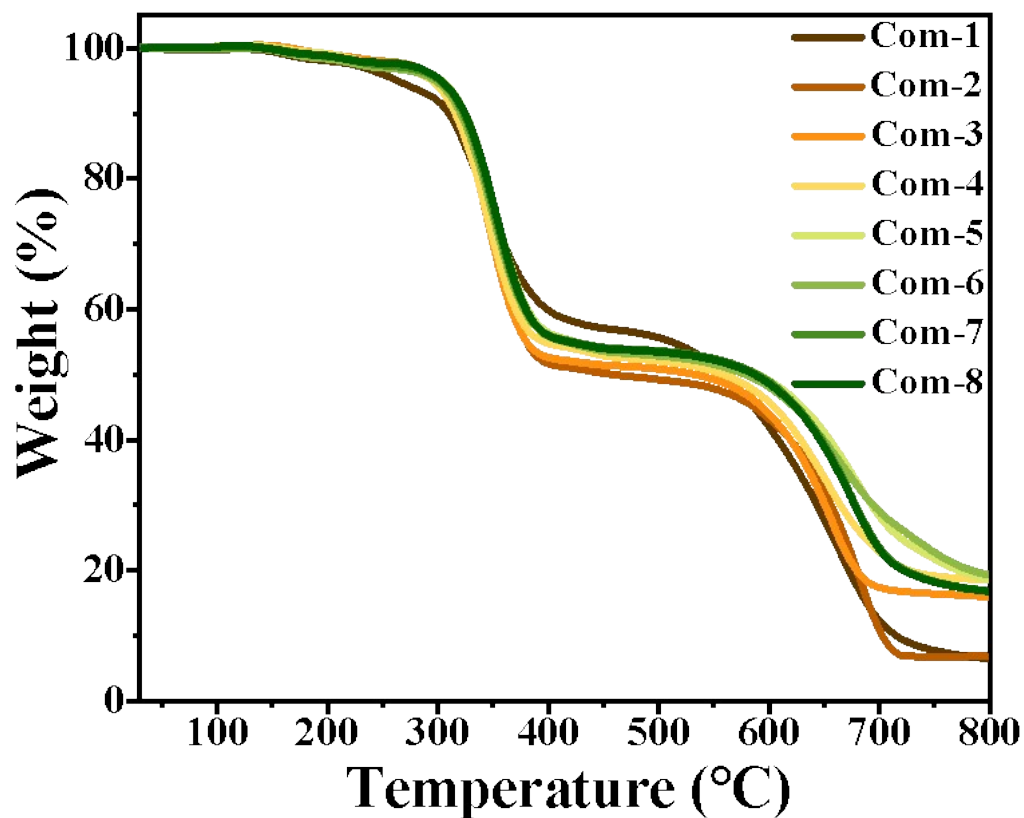

Fig. S8. The thermogravimetric analysis (TGA) curves for selected compounds 1-8.

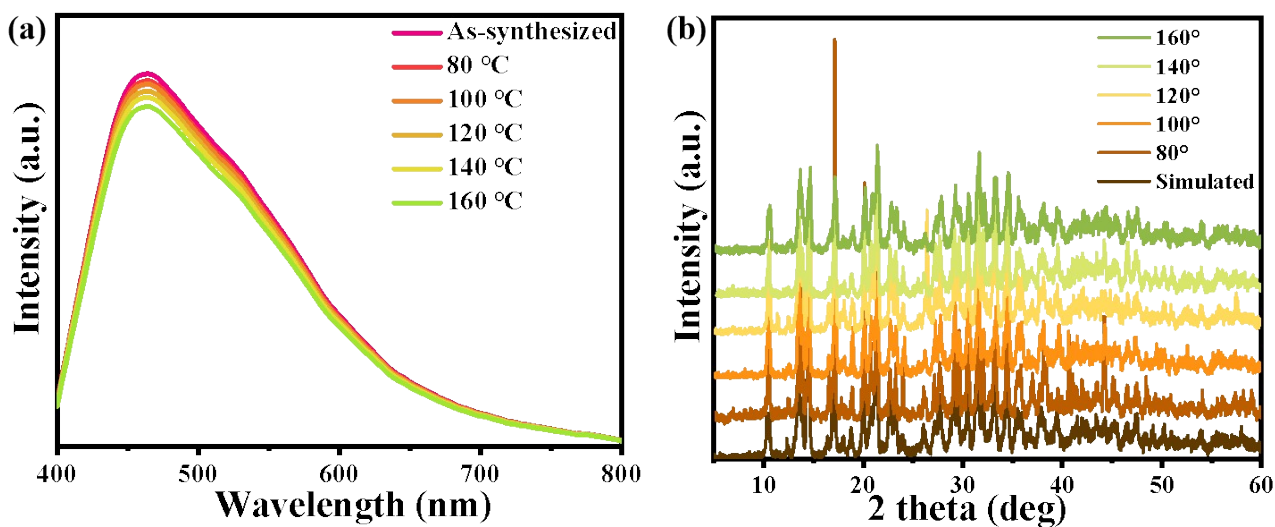

**Fig. S9.** The pristine and experimental emission spectra (a) and XRD patterns (b) of compound **1** after heating anneal over 10 hours.

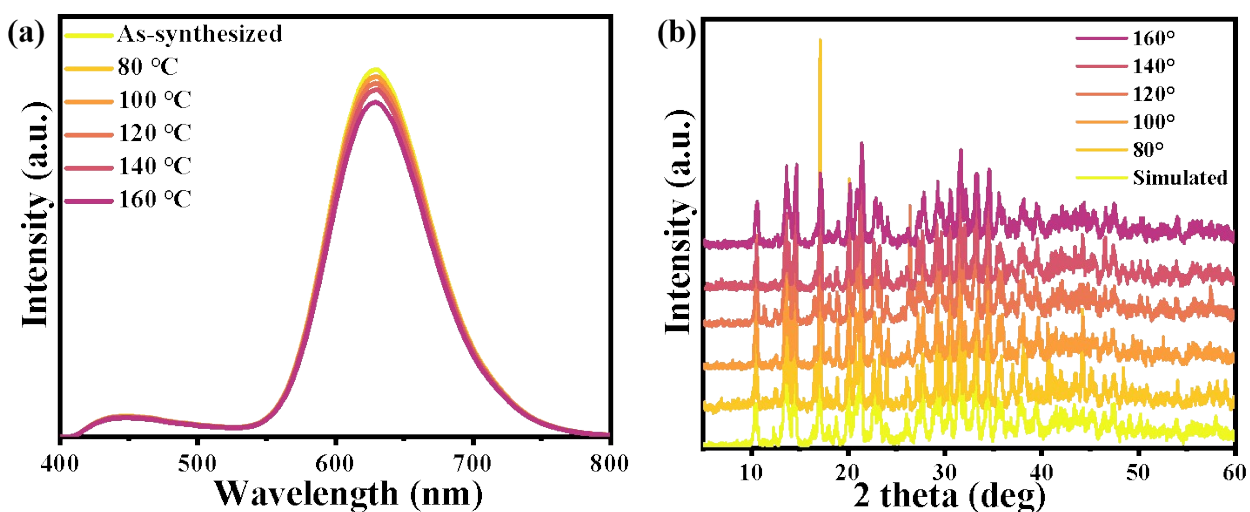

**Fig. S10.** The pristine and experimental emission spectra (a) and XRD patterns (b) of compound **8** after heating anneal over 10 hours.

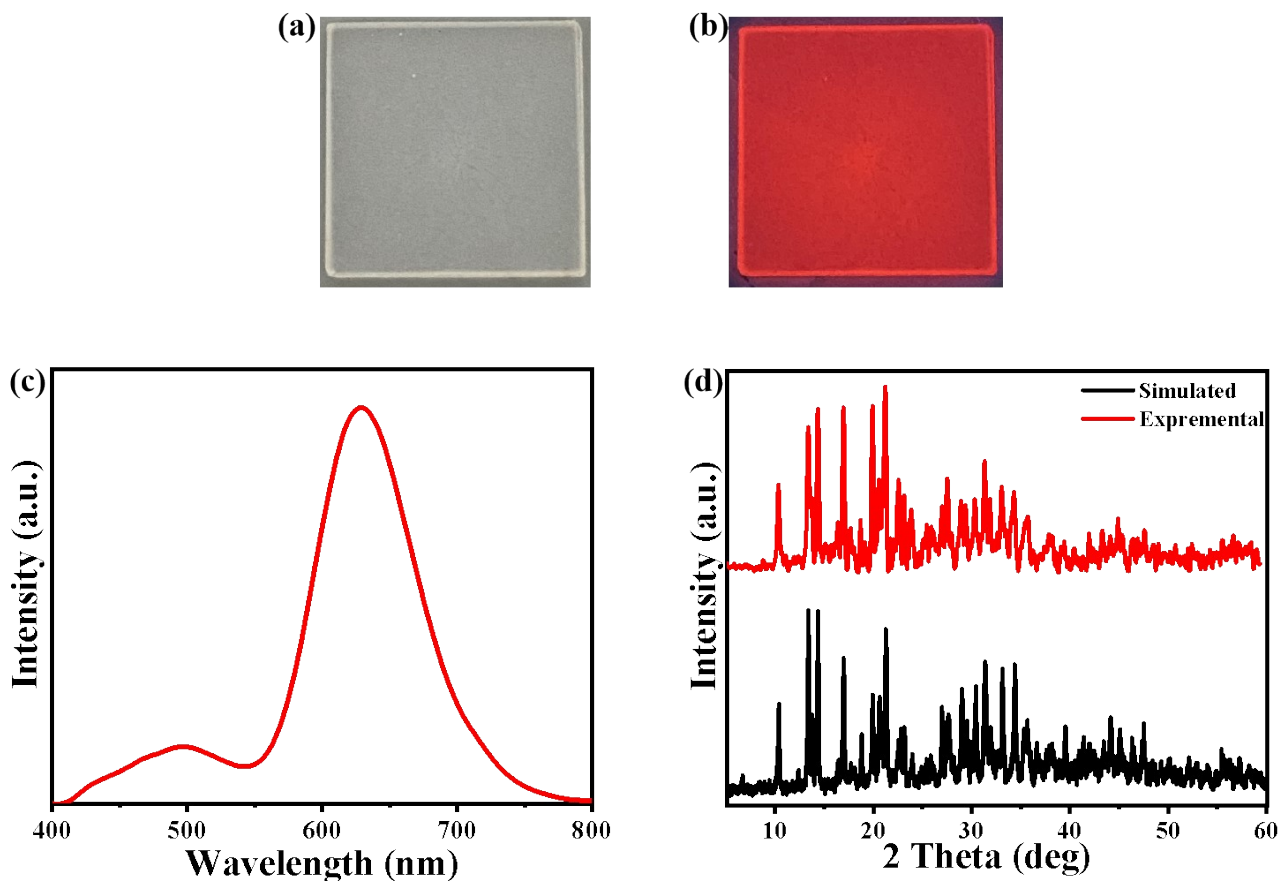

**Fig. S11.** The photographs of compound **8** based film under ambient light (a) and 365 nm UV light (b); the emission spectra (c) and XRD patterns (d) of compound **8** based film.

**Table S1.** Crystal Data and Structural Refinements for compound **1**.

| Compound         | <b>1</b>                      |
|------------------|-------------------------------|
| chemical formula | $C_{12}H_{38}N_6Pb_2Cl_{10}O$ |
| fw               | 1051.36                       |
| Space group      | $P2_1/c$                      |
| crystal system   | Monoclinic system             |
| $a/\text{\AA}$   | 13.4649(6)                    |
| $b/\text{\AA}$   | 17.1481(8)                    |
| $c/\text{\AA}$   | 13.2881(6)                    |



---

|                                                   |               |
|---------------------------------------------------|---------------|
| $\alpha/^\circ$                                   | 90            |
| $\beta/^\circ$                                    | 96.1950(6)    |
| $\gamma/^\circ$                                   | 90            |
| $V(\text{\AA}^3)$                                 | 3050.3(2)     |
| Z                                                 | 4             |
| $D_{\text{calcd}} (\text{g}\cdot\text{cm}^{-3})$  | 2.289         |
| Temp (K)                                          | 296(2)        |
| $\mu (\text{mm}^{-1})$                            | 11.919        |
| $F(000)$                                          | 1976.0        |
| Reflections collected                             | 36103         |
| Unique reflections                                | 7032          |
| Reflections ( $I > 2\sigma(I)$ )                  | 5990          |
| GOF on $F^2$                                      | 1.014         |
| $R_1, wR_2 (I > 2\sigma(I))^a$                    | 0.0211/0.0400 |
| $R_1, wR_2$ (all data)                            | 0.0298/0.0419 |
| $\Delta\rho_{\text{max}} (\text{e}/\text{\AA}^3)$ | 0.96          |
| $\Delta\rho_{\text{min}} (\text{e}/\text{\AA}^3)$ | -0.57         |
| CCDC number                                       | 2252459       |

---

<sup>a</sup>  $R_1 = \sum||F_o| - |F_c||/\sum|F_o|$ ,  $wR_2 = \{\sum w[(F_o)^2 - (F_c)^2]^2/\sum w[(F_o)^2]^2\}^{1/2}$

**Table S2.** Selected bond lengths (Å) and bond angles (°) for compound **1**.

|                   |             |                     |            |
|-------------------|-------------|---------------------|------------|
| Pb(1)-Cl(3)       | 2.9409(10)  | Cl(9)-Pb(1)-Cl(10)  | 79.80(3)   |
| Pb(1)-Cl(4)       | 3.05845(17) | Cl(10)-Pb(1)-Cl(3)  | 175.76(3)  |
| Pb(1)-Cl(7)       | 2.8695(9)   | Cl(10)-Pb(1)-Cl(4)  | 84.910(19) |
| Pb(1)-Cl(8)       | 2.8156(10)  | Cl(10)-Pb(1)-Cl(7)  | 91.44(3)   |
| Pb(1)-Cl(9)       | 2.8075(10)  | Cl(10)-Pb(1)-Cl(8)  | 96.90(3)   |
| Pb(1)-Cl(10)      | 2.8083(9)   | Cl(1)-Pb(2)-Cl(2)   | 90.11(2)   |
| Pb(2)-Cl(1)       | 2.90264(16) | Cl(1)-Pb(2)-Cl(3)   | 96.79(2)   |
| Pb(2)-Cl(2)       | 3.0071(11)  | Cl(3)-Pb(2)-Cl(2)   | 94.74(3)   |
| Pb(2)-Cl(3)       | 2.9965(10)  | Cl(5)-Pb(2)-Cl(1)   | 90.32(3)   |
| Pb(2)-Cl(5)       | 2.7713(10)  | Cl(5)-Pb(2)-Cl(2)   | 171.77(3)  |
| Pb(2)-Cl(6)       | 2.7757(9)   | Cl(5)-Pb(2)-Cl(3)   | 93.37(3)   |
| Pb(2)-Cl(11)      | 2.8167(8)   | Cl(5)-Pb(2)-Cl(6)   | 87.27(3)   |
|                   |             | Cl(5)-Pb(2)-Cl(11)  | 88.75(3)   |
| Cl(3)-Pb(1)-Cl(4) | 98.71(2)    | Cl(1)-Pb(2)-Cl(6)   | 176.33(2)  |
| Cl(3)-Pb(1)-Cl(7) | 86.67(3)    | Cl(6)-Pb(2)-Cl(2)   | 91.88(3)   |
| Cl(7)-Pb(1)-Cl(4) | 85.464(19)  | Cl(6)-Pb(2)-Cl(3)   | 86.12(3)   |
| Cl(3)-Pb(1)-Cl(8) | 85.39(3)    | Cl(6)-Pb(2)-Cl(11)  | 82.87(3)   |
| Cl(8)-Pb(1)-Cl(4) | 89.37(2)    | Cl(11)-Pb(2)-Cl(1)  | 94.313(19) |
| Cl(8)-Pb(1)-Cl(7) | 169.77(3)   | Cl(11)-Pb(2)-Cl(2)  | 83.02(3)   |
| Cl(3)-Pb(1)-Cl(9) | 96.46(3)    | Cl(11)-Pb(2)-Cl(3)  | 168.68(3)  |
| Cl(9)-Pb(1)-Cl(4) | 164.39(2)   | Pb(2)-Cl(1)-Pb(2)#1 | 180        |
| Cl(9)-Pb(1)-Cl(7) | 91.78(3)    | Pb(1)-Cl(3)-Pb(2)   | 169.03(4)  |
| Cl(9)-Pb(1)-Cl(8) | 95.51(3)    | Pb(1)#2-Cl(1)-Pb(1) | 180        |

Symmetry transformations used to generate equivalent atoms: #1 2-x, -y, 2-z, #2 1-x, -y, 1-z

**Table S3.** Hydrogen bonds data for compound **1**.

| D-H···A               | d(D-H) | d(H···A) | d(D···A) | <(DHA) |
|-----------------------|--------|----------|----------|--------|
| N(1)-H(1A)···Cl(2)    | 0.89   | 2.230    | 3.053    | 153.49 |
| N(1)-H(1B)···Cl(1)    | 0.89   | 2.631    | 3.454    | 154.22 |
| N(1)-H(1C)···Cl(6)    | 0.89   | 2.193    | 3.062    | 165.30 |
| N(1a)-H(1aB)···Cl(11) | 0.89   | 2.894    | 3.435    | 120.74 |
| N(1a)-H(1aB)···Cl(2)  | 0.89   | 2.280    | 3.146    | 164.04 |
| N(1a)-H(1aB)···Cl(6)  | 0.89   | 2.509    | 3.307    | 149.57 |
| N(4)-H(4A)···O(1)     | 0.89   | 1.934    | 2.805    | 165.80 |
| N(4)-H(4B)···Cl(8)    | 0.89   | 2.435    | 3.278    | 158.17 |
| N(5)-H(5)···Cl(6)     | 0.98   | 2.585    | 3.295    | 129.46 |
| N(5)-H(5)···Cl(11)    | 0.98   | 2.544    | 3.338    | 138.11 |
| C(1)-H(1E)···Cl(4)    | 0.97   | 2.889    | 3.673    | 138.61 |
| C(1)-H(1E)···Cl(7)    | 0.97   | 2.779    | 3.471    | 128.84 |
| C(2)-H(2B)···Cl(8)    | 0.97   | 2.931    | 3.689    | 135.80 |
| C(3)-H(3A)···Cl(5)    | 0.97   | 2.842    | 3.771    | 160.45 |
| C(3)-H(3A)···Cl(6)    | 0.97   | 2.749    | 3.264    | 113.83 |
| C(3)-H(3B)···Cl(8)    | 0.97   | 2.783    | 3.583    | 140.29 |
| C(3)-H(3B)···Cl(11)   | 0.97   | 2.917    | 3.66     | 134.16 |
| C(4)-H(4C)···Cl(2)    | 0.97   | 2.891    | 3.715    | 143.34 |
| C(4)-H(4D)···Cl(6)    | 0.97   | 2.864    | 3.496    | 123.66 |
| C(16)-H(16A)···Cl(3)  | 0.97   | 2.683    | 3.646    | 172.20 |
| C(16)-H(16B)···Cl(11) | 0.97   | 2.800    | 3.671    | 149.86 |
| C(16a)-H(16C)···Cl(1) | 0.97   | 2.731    | 3.469    | 133.27 |
| C(16a)-H(16D)···Cl(5) | 0.97   | 2.916    | 3.871    | 168.37 |
| C(17)-H(17A)···Cl(9)  | 0.97   | 2.986    | 3.869    | 151.88 |
| C(17)-H(17B)···Cl(11) | 0.97   | 2.866    | 3.775    | 156.42 |
| C(17)-H(17C)···Cl(11) | 0.97   | 2.898    | 3.775    | 150.91 |
| C(17)-H(17D)···Cl(8)  | 0.97   | 2.867    | 3.798    | 161.08 |
| N(2)-H(2C)···Cl(10)   | 0.89   | 2.338    | 3.213    | 167.79 |

|                      |      |       |       |        |
|----------------------|------|-------|-------|--------|
| N(2)-H(2D)···Cl(11)  | 0.89 | 2.333 | 3.202 | 165.59 |
| N(2)-H(2E)···Cl(9)   | 0.89 | 2.373 | 3.170 | 149.15 |
| N(3)-H(3C)···Cl(7)   | 0.89 | 2.397 | 3.184 | 147.49 |
| N(3)-H(3D)···O(1)    | 0.89 | 1.949 | 2.837 | 175.09 |
| N(6)-H(6)···Cl(9)    | 0.98 | 2.481 | 3.25  | 135.11 |
| N(6)-H(6)···Cl(10)   | 0.98 | 2.573 | 3.323 | 133.36 |
| C(5)-H(5B)···Cl(7)   | 0.97 | 2.85  | 3.676 | 143.48 |
| C(7)-H(7B)···Cl(2)   | 0.97 | 2.902 | 3.768 | 149.15 |
| C(8)-H(8A)···Cl(10)  | 0.97 | 2.719 | 3.437 | 131.23 |
| C(8)-H(8B)···Cl(5)   | 0.97 | 2.96  | 3.768 | 141.56 |
| C(9)-H(9A)···Cl(5)   | 0.97 | 2.96  | 3.818 | 148.10 |
| C(9)-H(9A)···Cl(6)   | 0.97 | 2.914 | 3.589 | 127.61 |
| C(10)-H(10A)···Cl(7) | 0.97 | 2.87  | 3.684 | 142.04 |
| C(10)-H(10B)···Cl(5) | 0.97 | 2.816 | 3.705 | 152.65 |
| C(18)-H(18A)···Cl(4) | 0.97 | 2.936 | 3.679 | 134.21 |
| C(18)-H(18A)···Cl(8) | 0.97 | 2.884 | 3.610 | 132.44 |

Table S4. Detail of one-pot synthesis of Mn<sup>2+</sup>-doped 1D lead chloride crystals.

| Product           | PbCl <sub>2</sub> (mmol) | MnCl <sub>2</sub> ·4H <sub>2</sub> O (mmol) | C <sub>6</sub> H <sub>15</sub> N <sub>3</sub> (mmol) |
|-------------------|--------------------------|---------------------------------------------|------------------------------------------------------|
| compound <b>2</b> | 0.5                      | 0.1                                         | 0.6                                                  |
| compound <b>3</b> | 0.5                      | 0.2                                         | 0.6                                                  |
| compound <b>4</b> | 0.5                      | 0.3                                         | 0.6                                                  |
| compound <b>5</b> | 0.5                      | 0.4                                         | 0.6                                                  |
| compound <b>6</b> | 0.5                      | 0.5                                         | 0.6                                                  |
| compound <b>7</b> | 0.5                      | 0.6                                         | 0.6                                                  |
| compound <b>8</b> | 0.5                      | 0.7                                         | 0.6                                                  |

|                   |     |     |     |
|-------------------|-----|-----|-----|
| compound <b>9</b> | 0.5 | 0.8 | 0.6 |
|-------------------|-----|-----|-----|
